# Supplementary material for: The DIAMORFOSIS (DIAgnosis and Management Of lung canceR and FibrOSIS) survey: international survey and call for consensus
Source: PubMed Central journal article supplement — ERJ Open Res. 2021 Jan 25;7(1):00529-2020. doi: 10.1183/23120541.00529-2020 (PMC7837280; doi:10.1183/23120541.00529-2020), 2021-01-25
Supplement: 00529-2020.supplement2.pdf [file 00529-2020.supplement2.pdf]

## Supplementary data

### The DIAMORFOSIS (DIAGnosis and Management Of lung canceR and FibrOSIS) survey. International survey and call for consensus.

Argyris Tzouvelekis<sup>1</sup>, Katerina Antoniou<sup>2</sup>, Michael Kreuter<sup>3,4</sup>, Matthew Evison<sup>5</sup>, Torsten G Blum<sup>6</sup>, Venerino Poletti<sup>7</sup>, Bogdan Grigoriu<sup>8</sup>, Carlo Vancheri<sup>9</sup>, Paolo Spagnolo<sup>10</sup>, Theodoros Karampitsakos<sup>1</sup>, Francesco Bonella<sup>11</sup>, Athol Wells<sup>12</sup>, Ganesh Raghu<sup>13</sup>, Maria Molina-Molina<sup>14</sup>, Daniel Culver<sup>15</sup>, Elisabeth Bendstrup<sup>16</sup>, Nesrin Mogulkoc<sup>17</sup>, Stefano Elia<sup>18</sup>, Jacques Cadranel<sup>19</sup>, Demosthenes Bouros<sup>20</sup>

<sup>1</sup> Department of Internal and Respiratory Medicine, Medical School University of Patras, Greece; <sup>2</sup> Department of Respiratory Medicine, University of Crete, Greece; <sup>3</sup> Center for Interstitial and Rare Lung Diseases, Pneumology, Thoraxklinik, University of Heidelberg, Heidelberg, Germany; <sup>4</sup> German Center for Lung Research, Heidelberg, Germany, <sup>5</sup> Manchester Thoracic Oncology Centre, Wythenshawe Hospital, Manchester University NHS Foundation Trust, Manchester, UK; <sup>6</sup> Lungenklinik Heckeshorn, Helios Klinikum Emil von Behring, Berlin, Germany; <sup>7</sup> Department of Thoracic Diseases, "GB. Morgagni" Hospital, Forlì, Italy; <sup>8</sup> Service des Soins Intensifs et Urgences Oncologiques & Oncologie thoracique Institut Jules Bordet, Centre des Tumeurs de l'Université Libre de Bruxelles (ULB), Belgium; <sup>9</sup> Regional Referral Centre for Rare Lung Diseases, A. O. U. "Policlinico-Vittorio Emanuele" Dept. Of Clinical and Experimental Medicine, University of Catania, Italy; <sup>10</sup> Respiratory Disease Unit, Department of Cardiac Thoracic, Vascular Sciences and Public Health, University of Padova, Italy; <sup>11</sup> Dept of Pneumology and Allergy, Ruhrlandklinik Medical Faculty, University of Duisburg-Essen, Essen, Germany; <sup>12</sup> Interstitial Lung Disease Unit, Department of Respiratory Medicine, Royal Brompton and Harefield NHS Foundation Trust, London, UK; <sup>13</sup> Center for Interstitial Lung Disease, University of Washington, Seattle, WA, USA, <sup>14</sup> Hospital Universitari de Bellvitge, L'Hospitalet de Llobregat, Barcelona, Spain; <sup>15</sup> Cleveland Clinic, Respiratory Institute, Cleveland, OH, USA; <sup>16</sup> Center for Rare Lung Diseases, Department of Respiratory Diseases and Allergy, Aarhus University Hospital, Denmark. <sup>17</sup> Department of Pulmonology, Faculty of Medicine, Ege University; İzmir-Turkey; <sup>18</sup> Thoracic Surgery Unit, Tor Vergata University, Rome, Italy; <sup>19</sup> Service de Pneumologie, APHP, Hôpital Tenon and Sorbonne Université, Paris, France; <sup>20</sup> First Academic Department of Respiratory Medicine, National and Kapodistrian University of Athens, Greece

#### Correspondence:

Argyris Tzouvelekis MD, MSc, PhD

Associate Professor of Internal and Respiratory Medicine

Medical School, University of Patras, Greece

[argyrios.tzouvelekis@fleming](mailto:argyrios.tzouvelekis@fleming)

Idiopathic Pulmonary Fibrosis (IPF) is a debilitating fibrotic lung disease with a steady increase in both incidence and mortality. In addition, the clinical course of patients with IPF is often complicated by major comorbidities including lung cancer. Despite abundant epidemiologic and mechanistic links between IPF and lung cancer there is considerable lack of knowledge on the diagnostic and therapeutic management of these patients.

To this end, the ERS Assembly 12 (Interstitial Lung Diseases), took the initiative to collaborate with Assembly 11 (Thoracic Oncology) and Assembly 8 (Thoracic Surgery and Lung Transplantation) to create and launch a joint-survey, namely DIAMORFOSIS (DIAGNOSIS and Management Of lung canceR and FibrOSIS), in which we invite you to participate by clicking in the following link and answering the questions included.

The main objectives of this survey are:

- To identify variations in diagnostic and management strategies across different hospitals and institutions
- To raise awareness on the association between the two conditions
- To provide rationale for a consensus statement for an improved, homogeneous and standardized approach

The estimated time of completion is less than 10 minutes. We greatly appreciate your time and we anticipate your valuable feedback. Results of the survey will be exploited as a publication in an ERS-journal and/or abstract in upcoming ERS and ATS international conferences. Names of the respondents will be included as collaborators in the acknowledgement section of the manuscript.

**1. In which country do you practice?**

.....

**2. What is your medical specialty?**

*Pulmonologist*

*Oncologist*

*Thoracic surgeon*

*Anesthesiologist*

*Pulmo-oncologist*

*Radio-oncologist*

*Other (please specify)*

**3. How many years of experience do you have as a specialist?**

*Less than 5*

*5-10*

*11-15*

*16-20*

*More than 20*

**4. What is your hospital setting?**

*University Hospital*

*Non-university hospital*

*Private institution/practice*

**5. How many patients with IPF do you treat per year?**

*<10*

*10-20*

*20-50*

*More than 50*

*Unknown*

**6. What is the incidence of lung cancer in patients with IPF?**

1-5%

5-10%

10-20%

>20%

**7. How often do you involve a multi-disciplinary team on the management of patients with IPF and lung cancer?**

Always

Sometimes

Never

**8. What diagnostic modality do you use to screen patients with IPF for lung cancer (more than one answers possible)?**

Regular low dose HRCT scan

Regular CXR

HRCT scan in case of symptoms

Tumor markers (Ca19/9, CA125, CEA)

No screening

Other (please specify)

**9. What is the most common histologic subtype of lung cancer in patients with IPF?**

NSCLC-Adenocarcinoma

NSCLC-Squamous cell

NSCLC- other

Small cell

I don't know

None of the above

**10. What is the most common anatomical location for lung cancer in patients with IPF?**

Upper lobes

Middle lobe or lingula

Lower lobes

I don't know

**11. What is the median latency time (months) between IPF and lung cancer diagnosis in your experience?**

0 (synchronous diagnosis)

<12

12-24

24-36

>36

Unknown

**12. What percentage of patients with IPF present with other types of cancer (non-lung cancer)?**

<1%

1-5%

5-10%

10-20%

Unknown

Other (please specify)

**13. Which is the most common type of malignancy other than lung cancer occurring in patients with IPF?**

Breast cancer

Colon cancer

Prostate cancer

Hematologic malignancies (excluding MDS)

Liver cancer

Renal cancer

Urinary bladder cancer

Unknown

Other (please specify)

**14. Do you agree with the following statement: moderate to severe IPF is an absolute contraindication to radiotherapy or chemoradiotherapy in locally advanced NSCLC.**

Strongly agree

Agree

I am not sure

Disagree

Strongly disagree

I don't know

**15. Do you consider any of the following treatments for advanced stage NSCLC an absolute contraindication in moderate to severe IPF (more than one answer possible)**

Platinum based chemotherapy

Docetaxel

Immunotherapy

Tyrosine kinase inhibitors

Bevacizumab

None of the above

I don't know

Other (please specify)

**16. Do you continue anti-fibrotic treatment (pirfenidone or nintedanib) when a patient is diagnosed with lung cancer (any stage)?**

Yes

No

Other (please specify)

**17. Which safety precautions do you apply to patients with IPF and non-small cell lung cancer undergoing surgical lung interventions?**

Low tidal volume

Avoidance of high fraction of inspired oxygen

Minimal perioperative administration of fluids

Stop antifibrotic drugs

Continuation of antifibrotic drugs

Other (please specify)

**18. How would you treat a patient with advanced IPF (DLCO<35%, FVC<50%, and otherwise operable non-small cell lung cancer nodule (TNM stage I-II)?**

surgery

stereotactic radiotherapy

palliative care

doublet platinum  $\pm$  bevacizumab

Immunotherapy

Targeted therapy

Antifibrotics

Other (please specify)

**19. How would you treat a patient with advanced IPF (DLCO<35%, FVC<50%) and metastatic NSCLC (TNM IV) ?**

Palliative care

doublet platinum  $\pm$  bevacizumab

Immunotherapy i.e. PDL1 inhibitors

Targeted therapy

Anti-fibrotics

Other (please specify)

**20. How would you treat a patient with mild-to-moderate IPF (DLCO>35%, FVC>50%), and otherwise operable non-small cell lung cancer nodule (TNM stage I-II)?**

surgery

stereotactic radiotherapy

palliative care

doublet platinum  $\pm$  bevacizumab

Immunotherapy i.e. PDL1 inhibitors

Targeted therapy

Antifibrotics

Other (please specify)

**21. What would it be your next diagnostic step in a patient with mild-to-moderate IPF (DLCO>35%, FVC>50%) with a central nodular lesion of 20 mm and mediastinal lymphadenopathy?**

Monitor the patient with HRCT scan every 3-6 months

Perform PET CT scan and do not change your routine follow-up work if negative

Perform PET CT scan and if positive then apply endobronchial ultrasound-guided transbronchial needle biopsy (EBUS-TBNB)

None of the above

Other (please specify)

**22. What would it be your next diagnostic step in a patient with severe IPF (DLCO<35%, FVC<50%) with a central nodular lesion of 20mm and mediastinal lymphadenopathy?**

Monitor the patient with HRCT scan every 3-6 months

Perform PET CT scan and do not change your routine follow-up work if negative

Perform PET CT scan and if positive then apply endobronchial ultrasound-guided transbronchial needle biopsy (EBUS-TBNB)

Perform surgical lung biopsy (VATS) and resection without histological proof prior to surgery

None of the above

Other (please specify)

**23. Do you think a consensus statement for the diagnosis and management of patients with IPF and lung cancer is necessary?**

Yes

No

**24. Other points that are missing and considered to be necessary.....**

**25. Please provide your personal contact details (non-mandatory).....**
