# Supplementary material for: The DIAMORFOSIS (DIAgnosis and Management Of lung canceR and FibrOSIS) survey: international survey and call for consensus
Source: PubMed Central journal article supplement — ERJ Open Res. 2021 Jan 25;7(1):00529-2020. doi: 10.1183/23120541.00529-2020 (PMC7837280; doi:10.1183/23120541.00529-2020), 2021-01-25
Supplement: 00529-2020.supplement3.pdf [file 00529-2020.supplement3.pdf]

## Supplementary data

### The DIAMORFOSIS (DIAGnosis and Management Of lung canceR and FibrOSIS) survey. International survey and call for consensus.

Argyris Tzouvelekis<sup>1</sup>, Katerina Antoniou<sup>2</sup>, Michael Kreuter<sup>3,4</sup>, Matthew Evison<sup>5</sup>, Torsten G Blum<sup>6</sup>, Venerino Poletti<sup>7</sup>, Bogdan Grigoriu<sup>8</sup>, Carlo Vancheri<sup>9</sup>, Paolo Spagnolo<sup>10</sup>, Theodoros Karampitsakos<sup>1</sup>, Francesco Bonella<sup>11</sup>, Athol Wells<sup>12</sup>, Ganesh Raghu<sup>13</sup>, Maria Molina-Molina<sup>14</sup>, Daniel Culver<sup>15</sup>, Elisabeth Bendstrup<sup>16</sup>, Nesrin Mogulkoc<sup>17</sup>, Stefano Elia<sup>18</sup>, Jacques Cadranel<sup>19</sup>, Demosthenes Bouros<sup>20</sup>

<sup>1</sup> Department of Internal and Respiratory Medicine, Medical School University of Patras, Greece; <sup>2</sup> Department of Respiratory Medicine, University of Crete, Greece; <sup>3</sup> Center for Interstitial and Rare Lung Diseases, Pneumology, Thoraxklinik, University of Heidelberg, Heidelberg, Germany; <sup>4</sup> German Center for Lung Research, Heidelberg, Germany; <sup>5</sup> Manchester Thoracic Oncology Centre, Wythenshawe Hospital, Manchester University NHS Foundation Trust, Manchester, UK; <sup>6</sup> Lungenklinik Heckeshorn, Helios Klinikum Emil von Behring, Berlin, Germany; <sup>7</sup> Department of Thoracic Diseases, "GB. Morgagni" Hospital, Forlì, Italy; <sup>8</sup> Service des Soins Intensifs et Urgences Oncologiques & Oncologie thoracique Institut Jules Bordet, Centre des Tumeurs de l'Université Libre de Bruxelles (ULB), Belgium; <sup>9</sup> Regional Referral Centre for Rare Lung Diseases, A. O. U. "Policlinico-Vittorio Emanuele" Dept. Of Clinical and Experimental Medicine, University of Catania, Italy; <sup>10</sup> Respiratory Disease Unit, Department of Cardiac Thoracic, Vascular Sciences and Public Health, University of Padova, Italy; <sup>11</sup> Dept of Pneumology and Allergy, Ruhrlandklinik Medical Faculty, University of Duisburg-Essen, Essen, Germany; <sup>12</sup> Interstitial Lung Disease Unit, Department of Respiratory Medicine, Royal Brompton and Harefield NHS Foundation Trust, London, UK; <sup>13</sup> Center for Interstitial Lung Disease, University of Washington, Seattle, WA, USA; <sup>14</sup> Hospital Universitari de Bellvitge, L'Hospitalet de Llobregat, Barcelona, Spain; <sup>15</sup> Cleveland Clinic, Respiratory Institute, Cleveland, OH, USA; <sup>16</sup> Center for Rare Lung Diseases, Department of Respiratory Diseases and Allergy, Aarhus University Hospital, Denmark; <sup>17</sup> Department of Pulmonology, Faculty of Medicine, Ege University; İzmir-Turkey; <sup>18</sup> Thoracic Surgery Unit, Tor Vergata University, Rome, Italy; <sup>19</sup> Service de Pneumologie, APHP, Hôpital Tenon and Sorbonne Université, Paris, France; <sup>20</sup> First Academic Department of Respiratory Medicine, National and Kapodistrian University of Athens, Greece

#### Correspondence:

Argyris Tzouvelekis MD, MSc, PhD

Associate Professor of Internal and Respiratory Medicine

Medical School, University of Patras, Greece

[argyrios.tzouvelekis@fleming](mailto:argyrios.tzouvelekis@fleming)

**Table 1. In which country do you practice?**

| <b>Answer</b>  | <b>% of respondents</b> | <b>N (respondents)</b> |
|----------------|-------------------------|------------------------|
| ALBANIA        | 0,20%                   | 1                      |
| ALGERIA        | 1,20%                   | 6                      |
| ARGENTINA      | 2,40%                   | 12                     |
| AUSTRALIA      | 2,40%                   | 12                     |
| AUSTRIA        | 0,80%                   | 4                      |
| BELGIUM        | 1,80%                   | 9                      |
| BRAZIL         | 2,80%                   | 14                     |
| CANADA         | 1,60%                   | 8                      |
| CHILE          | 0,40%                   | 2                      |
| CROATIA        | 1,40%                   | 7                      |
| CZECH REPUBLIC | 0,40%                   | 2                      |
| DENMARK        | 0,80%                   | 4                      |
| EGYPT          | 0,60%                   | 3                      |
| FINLAND        | 0,40%                   | 2                      |
| FRANCE         | 8,50%                   | 42                     |
| GEORGIA        | 0,20%                   | 1                      |
| GERMANY        | 8,90%                   | 44                     |
| GREECE         | 5,00%                   | 25                     |
| HONG KONG      | 0,20%                   | 1                      |
| HUNGARY        | 0,40%                   | 2                      |
| ICELAND        | 0,20%                   | 1                      |
| INDIA          | 2,20%                   | 11                     |
| INDONESIA      | 0,60%                   | 3                      |
| IRELAND        | 0,60%                   | 3                      |
| IRAN           | 0,20%                   | 1                      |
| ISRAEL         | 0,40%                   | 2                      |
| ITALY          | 7,60%                   | 38                     |
| JAPAN          | 5,00%                   | 25                     |
| KOREA          | 0,40%                   | 2                      |
| LIBAN          | 0,20%                   | 1                      |
| LITHUANIA      | 0,40%                   | 2                      |
| MALAYSIA       | 0,20%                   | 1                      |
| MEXICO         | 1,20%                   | 6                      |
| NETHERLANDS    | 1,80%                   | 9                      |
| NEW ZEALAND    | 0,60%                   | 3                      |
| NORWAY         | 0,40%                   | 2                      |
| PAKISTAN       | 0,60%                   | 3                      |
| PARAGUAY       | 0,20%                   | 1                      |
| PERU           | 1,00%                   | 5                      |
| POLAND         | 1,60%                   | 8                      |
| PORTUGAL       | 3,40%                   | 17                     |

|                     |       |    |
|---------------------|-------|----|
| REPUBLIC OF MOLDOVA | 0,20% | 1  |
| ROMANIA             | 1,40% | 7  |
| RUSSIA              | 0,60% | 3  |
| SAUDI ARABIA        | 0,40% | 2  |
| SERBIA              | 1,00% | 5  |
| SINGAPORE           | 0,80% | 4  |
| SOUTH KOREA         | 0,80% | 4  |
| SPAIN               | 5,60% | 28 |
| SWEDEN              | 2,00% | 10 |
| SWITZERLAND         | 1,00% | 5  |
| TUNISIA             | 0,08% | 4  |
| TURKEY              | 2,20% | 11 |
| UAE                 | 0,20% | 1  |
| UKRAINE             | 0,40% | 2  |
| UNITED KINGDOM      | 6,20% | 31 |
| USA                 | 4,40% | 22 |
| URUGUAY             | 0,20% | 1  |
| VENEZUELA           | 0,20% | 1  |
| VIETNAM             | 0,20% | 1  |

---

**Table 2. What is your medical specialty?**

| <b>Answer</b>          | <b>% of respondents</b> | <b>N (respondents)</b> |
|------------------------|-------------------------|------------------------|
| Pulmonologist          | 94,06%                  | 396                    |
| Oncologist             | 0,71%                   | 3                      |
| Thoracic surgeon       | 2,14%                   | 9                      |
| Anesthesiologist       | 0,00%                   | 0                      |
| Pulmo-oncologist       | 1,19%                   | 5                      |
| Radio-oncologist       | 0,00%                   | 0                      |
| Other (please specify) | 1,90%                   | 8                      |

**Table 3. How many years of experience do you have as a specialist?**

| <b>Answer</b> | <b>% of respondents</b> | <b>N (respondents)</b> |
|---------------|-------------------------|------------------------|
| Less than 5   | 13,81%                  | 66                     |
| 5-10          | 23,01%                  | 110                    |
| 11-15         | 20,51%                  | 98                     |
| 16-20         | 11,92%                  | 57                     |
| More than 20  | 30,75%                  | 147                    |

**Table 4. What is your hospital setting?**

| <b>Answer</b>                | <b>% of respondents</b> | <b>N (respondents)</b> |
|------------------------------|-------------------------|------------------------|
| University Hospital          | 68,81%                  | 331                    |
| Non-university hospital      | 22,25%                  | 107                    |
| Private institution/practice | 8,94%                   | 43                     |

**Table 5. How many patients with IPF do you treat per year?**

| <b>Answer</b> | <b>% of respondents</b> | <b>N (respondents)</b> |
|---------------|-------------------------|------------------------|
| <10           | 19,92%                  | 97                     |
| 10-20         | 26,69%                  | 130                    |
| 20-50         | 24,85%                  | 121                    |
| More than 50  | 26,69%                  | 130                    |
| Unknown       | 1,85%                   | 9                      |

**Table 6. What is the incidence of lung cancer in patients with IPF?**

| <b>Answer</b> | <b>% of respondents</b> | <b>N (respondents)</b> |
|---------------|-------------------------|------------------------|
| 1-5%          | 30,77%                  | 140                    |
| 5-10%         | 45,27%                  | 206                    |
| 10-20%        | 21,76%                  | 99                     |
| >20%          | 2,20%                   | 10                     |

**Table 7. How often do you involve a multi-disciplinary team on the management of patients with IPF and lung cancer?**

| <b>Answer</b> | <b>% of respondents</b> | <b>N (respondents)</b> |
|---------------|-------------------------|------------------------|
| Always        | 78,20%                  | 384                    |
| Sometimes     | 18,95%                  | 93                     |
| Never         | 2,85%                   | 14                     |

**Table 8. What diagnostic modality do you use to screen patients with IPF for lung cancer (more than one answers possible)?**

| <b>Answer</b>                      | <b>% of respondents</b> | <b>N (respondents)</b> |
|------------------------------------|-------------------------|------------------------|
| Regular low dose HRCT scan         | 49,59%                  | 242                    |
| Regular CXR                        | 11,27%                  | 55                     |
| HRCT scan in case of symptoms      | 29,09%                  | 142                    |
| Tumor markers (Ca19/9, CA125, CEA) | 6,56%                   | 32                     |
| No screening                       | 17,62%                  | 86                     |
| Other (please specify)             | 2,67%                   | 13                     |

**Table 9. What is the most common histologic subtype of lung cancer in patients with IPF?**

| <b>Answer</b>        | <b>% of respondents</b> | <b>N (respondents)</b> |
|----------------------|-------------------------|------------------------|
| NSCLC-Adenocarcinoma | 58,60%                  | 286                    |
| NSCLC-Squamous cell  | 26,64%                  | 130                    |
| NSCLC- other         | 1,64%                   | 8                      |
| Small cell           | 0,00%                   | 0                      |
| I don't know         | 12,30%                  | 60                     |
| None of the above    | 0,82%                   | 4                      |

**Table 10. What is the most common anatomical location for lung cancer in patients with IPF?**

| <b>Answer</b>          | <b>% of respondents</b> | <b>N (respondents)</b> |
|------------------------|-------------------------|------------------------|
| Upper lobes            | 18,30%                  | 90                     |
| Middle lobe or lingula | 3,86%                   | 19                     |
| Lower lobes            | 53,86%                  | 265                    |
| I don't know           | 23,98%                  | 118                    |

**Table 11. What is the median latency time (months) between IPF and lung cancer diagnosis in your experience?**

| <b>Answer</b>             | <b>% of respondents</b> | <b>N (respondents)</b> |
|---------------------------|-------------------------|------------------------|
| 0 (synchronous diagnosis) | 4,07%                   | 20                     |
| <12                       | 11,20%                  | 55                     |
| 12-24                     | 20,37%                  | 100                    |
| 24-36                     | 23,22%                  | 114                    |
| >36                       | 13,44%                  | 66                     |
| Unknown                   | 27,70%                  | 136                    |



**Table 12. What percentage of patients with IPF present with other types of cancer (non-lung cancer)?**

| <b>Answer</b>          | <b>% of respondents</b> | <b>N (respondents)</b> |
|------------------------|-------------------------|------------------------|
| <1%                    | 16,46%                  | 81                     |
| 1-5%                   | 30,48%                  | 150                    |
| 5-10%                  | 9,55%                   | 47                     |
| 10-20%                 | 3,66%                   | 18                     |
| Unknown                | 38,82%                  | 191                    |
| Other (please specify) | 1,01%                   | 5                      |

**Table 13. Which is the most common type of malignancy other than lung cancer occurring in patients with IPF?**

| <b>Answer</b>                            | <b>% of respondents</b> | <b>N (respondents)</b> |
|------------------------------------------|-------------------------|------------------------|
| Breast cancer                            | 3,85%                   | 19                     |
| Colon cancer                             | 14,20%                  | 70                     |
| Prostate cancer                          | 19,27%                  | 95                     |
| Hematologic malignancies (excluding MDS) | 9,14%                   | 45                     |
| Liver cancer                             | 0,60%                   | 3                      |
| Renal cancer                             | 1,01%                   | 5                      |
| Urinary bladder cancer                   | 4,67%                   | 23                     |
| Unknown                                  | 45,64%                  | 225                    |
| Other (please specify)                   | 1,62%                   | 8                      |

**Table 14. Do you agree with the following statement: moderate to severe IPF is an absolute contraindication to radiotherapy or chemoradiotherapy in locally advanced NSCLC.**

| Answer            | % of respondents | N (respondents) |
|-------------------|------------------|-----------------|
| Strongly agree    | 7,93%            | 39              |
| Agree             | 29,27%           | 144             |
| I am not sure     | 20,33%           | 100             |
| Disagree          | 34,35%           | 169             |
| Strongly disagree | 5,88%            | 29              |
| I don't know      | 2,24%            | 11              |

**Table 15. Do you consider any of the following treatments for advanced stage NSCLC an absolute contraindication in moderate to severe IPF (more than one answer possible)?**

| Answer                      | % of respondents | N (respondents) |
|-----------------------------|------------------|-----------------|
| Platinum based chemotherapy | 16,93%           | 83              |
| Docetaxel                   | 13,27%           | 65              |
| Immunotherapy               | 16,73%           | 82              |
| Tyrosine kinase inhibitors  | 16,26%           | 92              |
| Bevacizumab                 | 6,12%            | 30              |
| None of the above           | 37,35%           | 183             |
| I don't know                | 22,24%           | 109             |
| Other (please specify)      | 1,02%            | 5               |

**Table 16. Do you continue anti-fibrotic treatment (pirfenidone or nintedanib) when a patient is diagnosed with lung cancer (any stage)?**

| <b>Answer</b>          | <b>% of respondents</b> | <b>N (respondents)</b> |
|------------------------|-------------------------|------------------------|
| Yes                    | 83,81%                  | 409                    |
| No                     | 8,40%                   | 41                     |
| Other (please specify) | 7,79%                   | 38                     |

**Table 17. Which safety precautions do you apply to patients with IPF and non-small cell lung cancer undergoing surgical lung interventions?**

| <b>Answer</b>                                  | <b>% of respondents</b> | <b>N (respondents)</b> |
|------------------------------------------------|-------------------------|------------------------|
| Low tidal volume                               | 67,30%                  | 321                    |
| Avoidance of high fraction of inspired oxygen  | 45,50%                  | 217                    |
| Minimal perioperative administration of fluids | 30,60%                  | 146                    |
| Stop antifibrotic drugs                        | 14,26%                  | 68                     |
| Continuation of antifibrotic drugs             | 55,14%                  | 263                    |
| Other (please specify)                         | 6,29%                   | 30                     |

**Table 18. How would you treat a patient with advanced IPF (DLCO<35%, FVC<50%), and otherwise operable non-small cell lung cancer nodule (TNM stage I-II)?**

| Answer                         | % of respondents | N (respondents) |
|--------------------------------|------------------|-----------------|
| Surgery                        | 21,43%           | 105             |
| stereotactic radiotherapy      | 54,09%           | 265             |
| palliative care                | 30,61%           | 150             |
| doublet platinum ± bevacizumab | 11,02%           | 54              |
| Immunotherapy                  | 16,94%           | 83              |
| Targeted therapy               | 24,49%           | 120             |
| Antifibrotics                  | 37,55%           | 184             |
| Other (please specify)         | 6,94%            | 34              |

**Table 19. How would you treat a patient with advanced IPF (DLCO<35%, FVC<50%) and metastatic NSCLC (TNM IV)?**

| Answer                             | % of respondents | N (respondents) |
|------------------------------------|------------------|-----------------|
| Palliative care                    | 69,13%           | 338             |
| doublet platinum ± bevacizumab     | 25,56%           | 125             |
| Immunotherapy i.e. PDL1 inhibitors | 31,90%           | 156             |
| Targeted therapy                   | 35,38%           | 173             |
| Anti-fibrotics                     | 37,01%           | 181             |
| Other (please specify)             | 5,32%            | 26              |

**Table 20. How would you treat a patient with mild-to-moderate IPF (DLCO>35%, FVC>50%) and otherwise operable non-small cell lung cancer nodule (TNM stage I-II)?**

| Answer                             | % of respondents | N (respondents) |
|------------------------------------|------------------|-----------------|
| Surgery                            | 78,23%           | 381             |
| stereotactic radiotherapy          | 40,45%           | 197             |
| palliative care                    | 10,68%           | 52              |
| doublet platinum ± bevacizumab     | 13,55%           | 66              |
| Immunotherapy i.e. PDL1 inhibitors | 16,22%           | 79              |
| Targeted therapy                   | 19,30%           | 94              |
| Antifibrotics                      | 40,04%           | 195             |
| Other (please specify)             | 9,03%            | 44              |

**Table 21. What would it be your next diagnostic step in a patient with mild-to-moderate IPF (DLCO>35%, FVC>50%) with a central nodular lesion of 20 mm and mediastinal lymphadenopathy?**

| <b>Answer</b>                                                                                                           | <b>% of respondents</b> | <b>N (respondents)</b> |
|-------------------------------------------------------------------------------------------------------------------------|-------------------------|------------------------|
| Monitor the patient with HRCT scan every 3-6 months                                                                     | 1,85%                   | 9                      |
| Perform PET CT scan and do not change your routine follow-up work if negative                                           | 3,50%                   | 17                     |
| Perform PET CT scan and if positive then apply endobronchial ultrasound-guided transbronchial needle biopsy (EBUS-TBNA) | 87,86%                  | 427                    |
| None of the above                                                                                                       | 0,82%                   | 4                      |
| Other (please specify)                                                                                                  | 5,97%                   | 29                     |

**Table 22. What would it be your next diagnostic step in a patient with severe IPF (DLCO<35%, FVC<50%) with a central nodular lesion of 20mm and mediastinal lymphadenopathy?**

| <b>Answer</b>                                                                                                           | <b>% of respondents</b> | <b>N (respondents)</b> |
|-------------------------------------------------------------------------------------------------------------------------|-------------------------|------------------------|
| Monitor the patient with HRCT scan every 3-6 months                                                                     | 9,16%                   | 45                     |
| Perform PET CT scan and do not change your routine follow-up work if negative                                           | 17,11%                  | 84                     |
| Perform PET CT scan and if positive then apply endobronchial ultrasound-guided transbronchial needle biopsy (EBUS-TBNB) | 59,67%                  | 293                    |
| Perform surgical lung biopsy (VATS) and resection without histological proof prior to surgery                           | 1,22%                   | 6                      |
| None of the above                                                                                                       | 5,71%                   | 28                     |
| Other (please specify)                                                                                                  | 7,13%                   | 35                     |

**Table 23. Do you think a consensus statement for the diagnosis and management of patients with IPF and lung cancer is necessary?**

| <b>Answer</b> | <b>% of respondents</b> | <b>N (respondents)</b> |
|---------------|-------------------------|------------------------|
| Yes           | 92,90%                  | 458                    |
| No            | 7,10%                   | 35                     |

**Table 24. Other points that are missing and considered to be necessary.**

| <b>Answer</b> | <b>% of respondents</b> | <b>N (respondents)</b> |
|---------------|-------------------------|------------------------|
| N/A           |                         |                        |

**Table 25. Please provide your personal contact details (non-mandatory).**

| <b>Answer</b> | <b>% of respondents</b> | <b>N (respondents)</b> |
|---------------|-------------------------|------------------------|
| N/A           |                         |                        |
